# Supplementary material for: Abscisic acid promotes auxin biosynthesis to inhibit primary root elongation in rice
Source: PubMed Central journal article supplement (PMC10022642; doi:10.1093/plphys/kiac586), 2022-12-19
Supplement: kiac586_supplementary_data.pdf [file kiac586_supplementary_data.pdf]

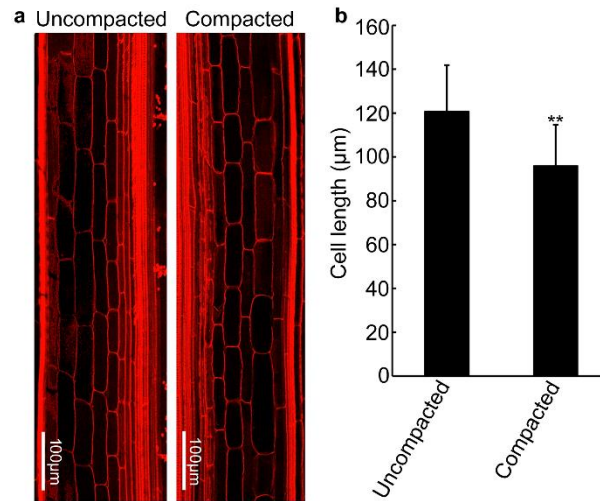

**Supplemental Figure S1.** Soil compaction inhibits cell elongation in maturation zone. (a) Representative propidium iodide staining of longitudinal sections of root maturation zones of 4-day-old WT seedlings grown in uncompact or compacted soil. Bars = 100 μm. (b) Cell length of the root maturation zone of the corresponding seedlings indicated in panel (a). Data are means ± SD ( $n \geq 10$  independent seedlings). Asterisks indicate significant differences compared with uncompact at  $***P < 0.01$  (Student's *t*-test).

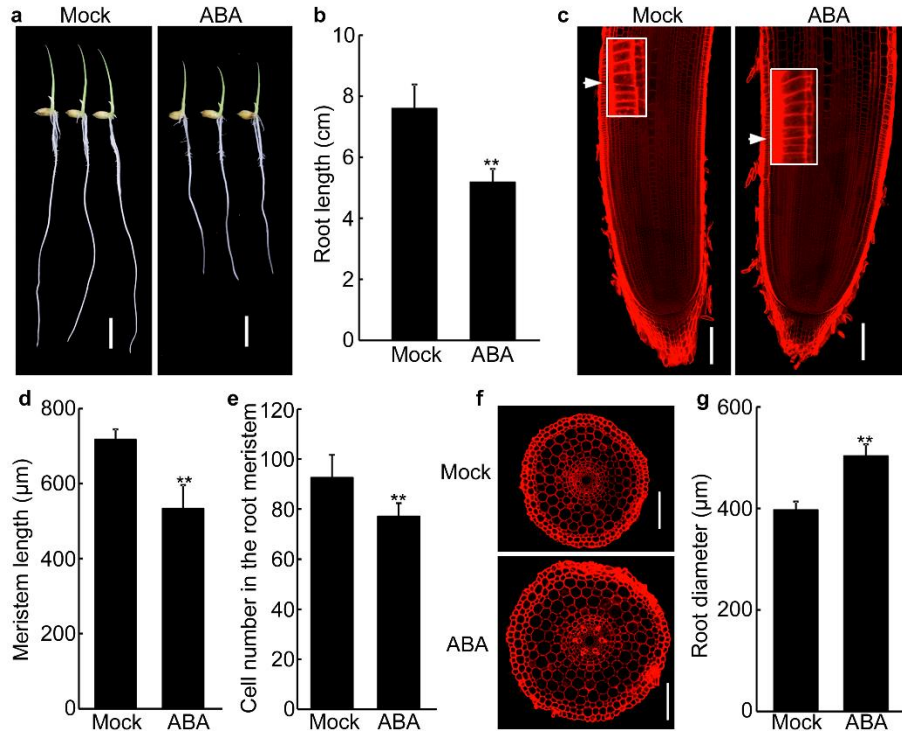

**Supplemental Figure S2.** ABA inhibits root elongation and promotes root swelling. (a and b) Morphology (a) and primary root length (b) of 4-day-old wild-type (WT) seedlings with or without 0.5  $\mu\text{M}$  ABA treatment. Bars = 1 cm. Data are means  $\pm$  SD ( $n \geq 30$  independent seedlings). (c) Representative propidium iodide staining of longitudinal sections of root tips of 4-day-old WT seedlings with or without 0.5  $\mu\text{M}$  ABA treatment. White arrows indicate the proximal end of the root meristem. White rectangle insets are an enlargement (3 times magnification) of the regions at the proximal end of the root meristem. Bars = 100  $\mu\text{m}$ . (d and e) Length (d) and cortical cell number (e) of the root meristem zones of the corresponding seedlings indicated in panel (c). Data are means  $\pm$  SD ( $n \geq 10$  independent seedlings). (f) Representative propidium iodide staining of radial sections of root elongation zone of 4-day-old WT seedlings with or without 0.5  $\mu\text{M}$  ABA treatment. Bars = 100  $\mu\text{m}$ . (g) Root diameter of the corresponding seedlings indicated in panel (f). Data are means  $\pm$  SD ( $n \geq 10$  independent seedlings). Asterisks in (b), (d), (e) and (g) indicate significant differences compared with mock at  $**P < 0.01$  (Student's *t*-test).

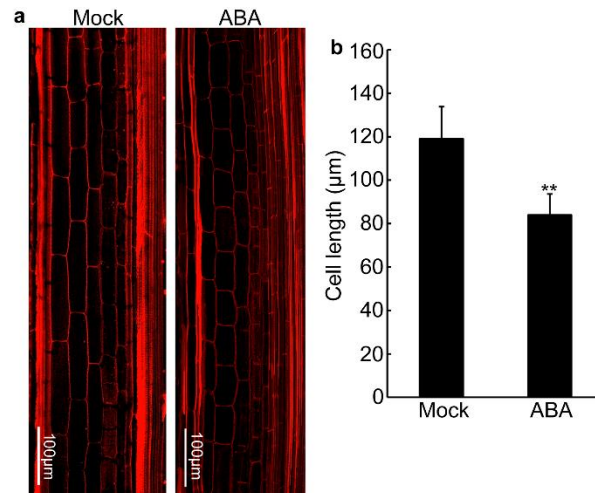

**Supplemental Figure S3.** ABA inhibits cell elongation in maturation zone. (a) Representative propidium iodide staining of longitudinal sections of root maturation zones of 4-day-old WT seedlings with or without 0.5  $\mu\text{M}$  ABA treatment. Bars = 100  $\mu\text{m}$ . (b) Cell length of the root maturation zone of the corresponding seedlings indicated in panel (a). Data are means  $\pm$  SD ( $n \geq 10$  independent seedlings). Asterisks indicate significant differences compared with mock at  $**P < 0.01$  (Student's  $t$ -test).

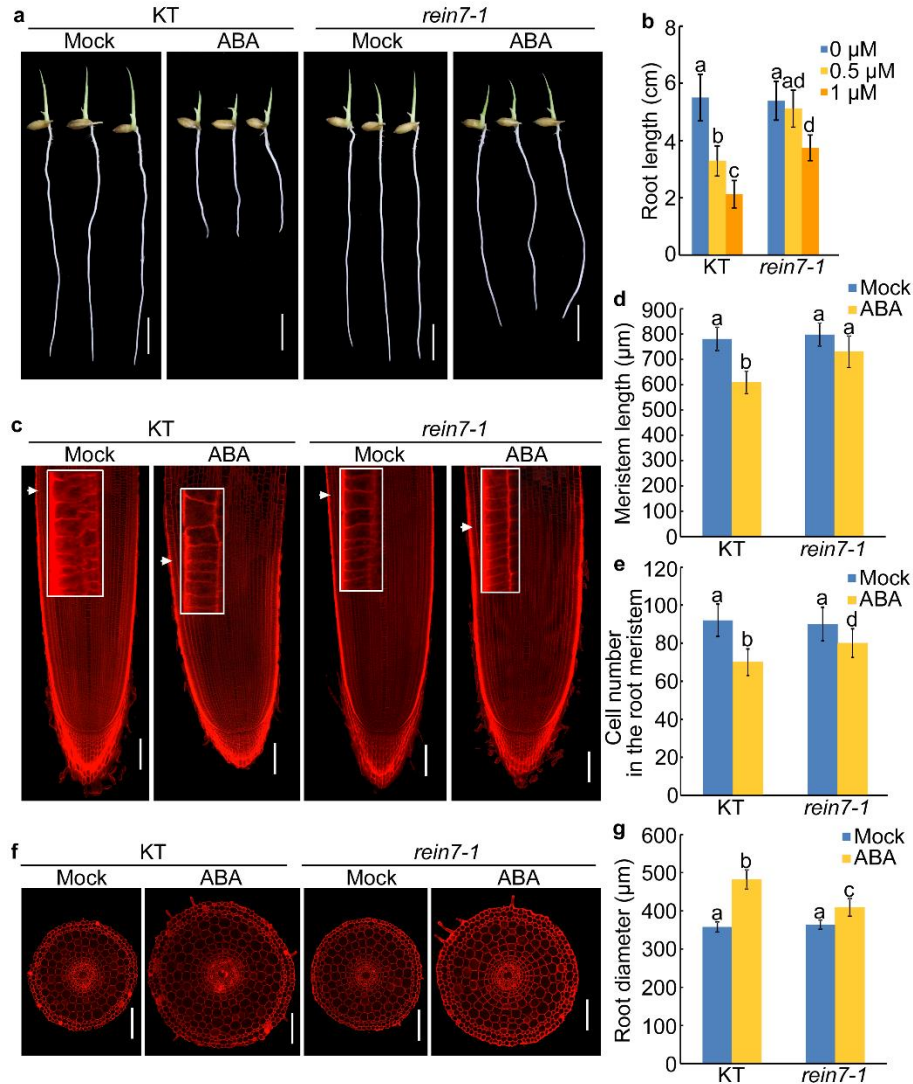

**Supplemental Figure S4.** *YUC8/REIN7*-mediated auxin biosynthesis is required for ABA-modulated root elongation and root swelling. (a) Phenotypes of the primary roots of 4-day-old Kitaake (KT, a wild-type strain) and *rein7-1* seedlings with or without 0.5  $\mu$ M ABA treatment. Bar = 1 cm. (b) Primary root length of 4-day-old KT and *rein7-1* seedlings treated with various concentrations of ABA. The data are shown as mean  $\pm$  SD,  $n \geq 30$  independent seedlings. (c) Representative propidium iodide staining of longitudinal sections of root tips of 4-day-old KT and *rein7-1* seedlings with or without 0.5  $\mu$ M ABA treatment. White arrows indicate the proximal end of the root meristem. White rectangle insets are an enlargement (3 times magnification) of the regions at the proximal end of the root meristem. Bars = 100  $\mu$ m. (d and e) Length (d) and cortical cell number (e) of the root meristem zones of the corresponding seedlings indicated in panel (c). Data are means  $\pm$  SD ( $n \geq 10$  independent seedlings). (f) Representative propidium iodide staining of radial sections of root elongation zone of 4-day-old KT and *rein7-1* seedlings with or without 0.5  $\mu$ M ABA treatment. Bars = 100  $\mu$ m. (g) Root diameter of the corresponding seedlings indicated in panel (f). Data are means  $\pm$  SD ( $n \geq 10$  independent seedlings). For (b), (d), (e) and (g), different letters indicate significant differences ( $P < 0.05$ , one-way ANOVA with Tukey's test).

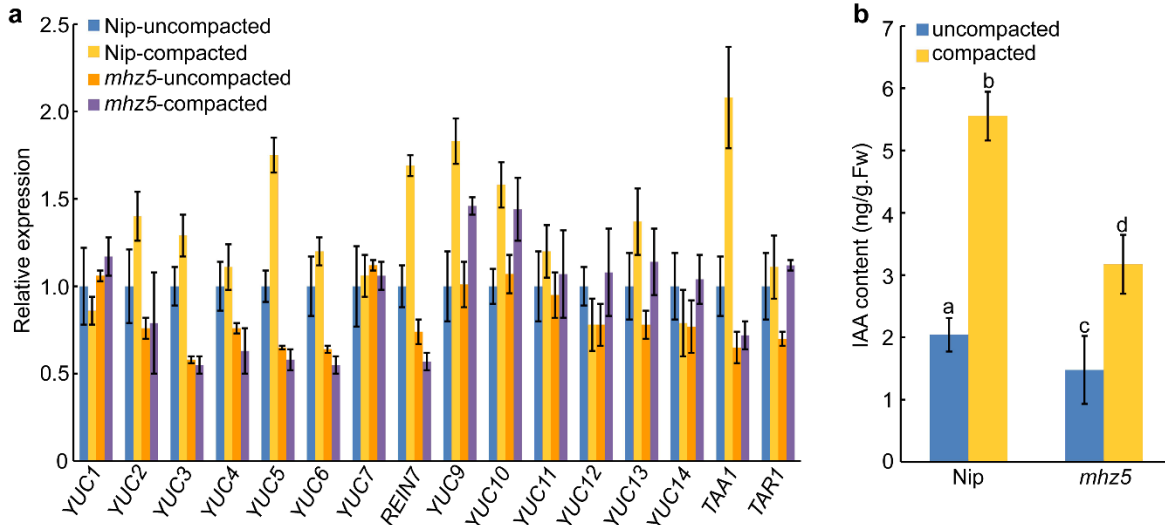

**Supplemental Figure S5.** Soil compaction induces higher expression of auxin biosynthesis genes and auxin accumulation is weakened in *mhz5* mutant roots. (a) Expression of *YUCs*, *TAA1* and *TAR1* in the roots of 4-d-old Nip and *mhz5* seedlings grown in uncompact or compact soil. The data are shown as mean  $\pm$  SD; n = 3 biological replicates. (b) Indole-3-acetic acid (IAA) contents in 4-d-old Nip and *mhz5* seedlings grown in uncompact or compact soil. The data are shown as mean  $\pm$  SD; n = 3 biological replicates. Different letters indicate significant differences ( $P < 0.05$ , one-way ANOVA with Tukey's test).

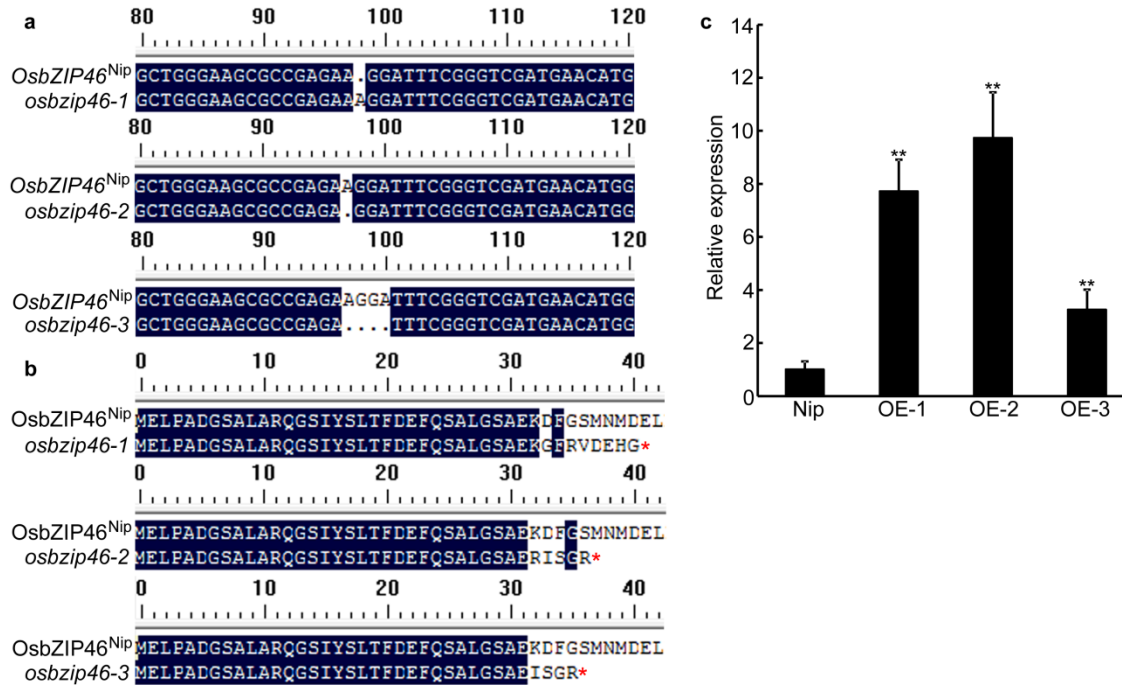

**Supplemental Figure S6.** Identification of *Os*bZIP46 mutants and overexpression lines. (a) DNA sequences of *Os*bZIP46 in *osbzip46* allelic mutants (*osbzip46-1*, *osbzip46-2*, and *osbzip46-3*) generated by CRISPR/Cas9. (b) Amino acid sequences of *Os*bZIP46 in *osbzip46* allelic mutants. (c) Expression analysis of *Os*bZIP46 in overexpression lines. Values indicate  $\pm$  SD (n = 3). \*\* indicates significant differences by Student's *t*-test compared to Nip at  $P < 0.01$ .

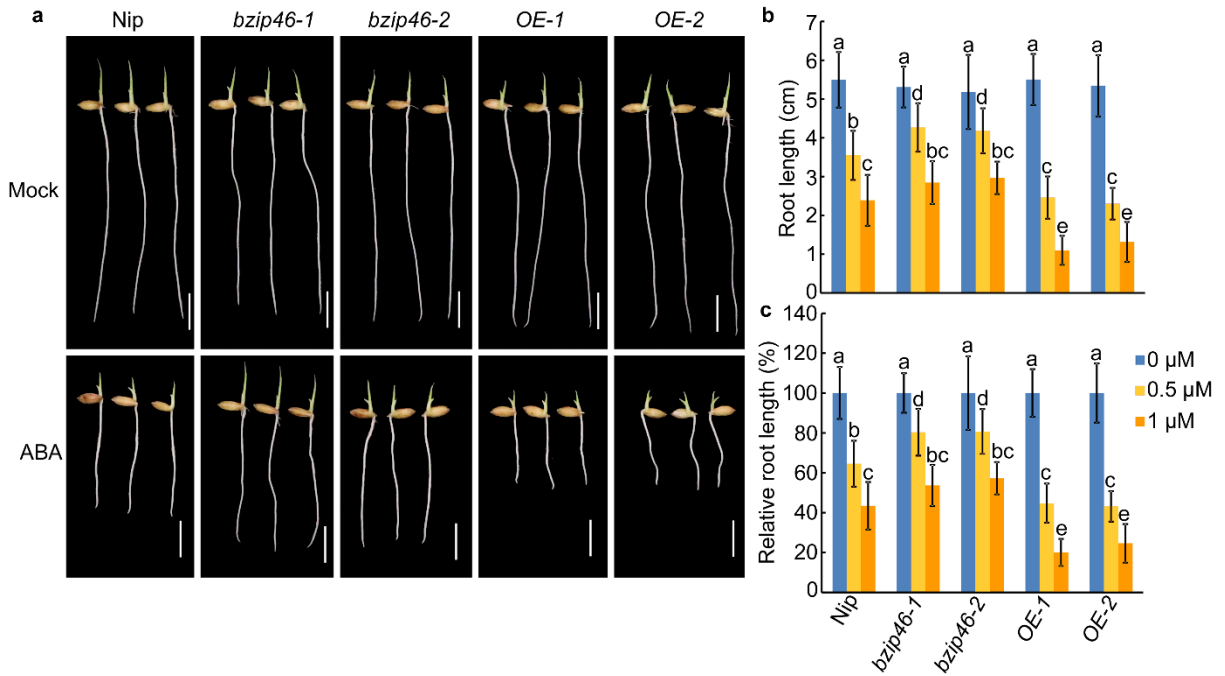

**Supplemental Figure S7.** *Os*bZIP46 positively regulates ABA response in roots. (a) Phenotypes of the primary roots of 4-day-old Nip, *Os*bZIP46 knockout and overexpression seedlings with or without 0.5  $\mu$ M ABA treatment. Bar = 1 cm. (b and c) Primary root length (b) and relative root length (c) of 4-day-old Nip, *Os*bZIP46 knockout and overexpression seedlings treated with various concentrations of ABA. The data are shown as mean  $\pm$  SD,  $n \geq 30$  independent seedlings. Different letters indicate significant differences ( $P < 0.05$ , one-way ANOVA with Tukey's test).

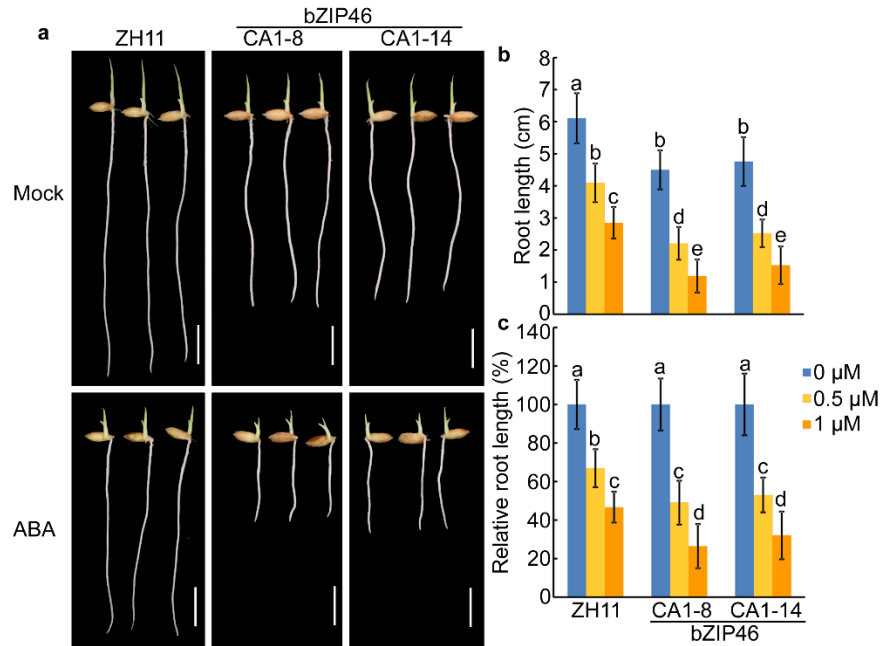

**Supplemental Figure S8.** Overexpression of the constitutively active (CA) form of *OsbZIP46* enhanced ABA response in roots. (a) Phenotypes of the primary roots of 4-day-old Zhonghua 11 (ZH11, a wild-type strain) and *OsbZIP46-CA1* overexpression seedlings with or without 0.5  $\mu$ M ABA treatment. Bar = 1 cm. (b and c) Primary root length (b) and relative root length (c) of 4-day-old ZH11 and *OsbZIP46-CA1* overexpression seedlings treated with various concentrations of ABA. The data are shown as mean  $\pm$  SD,  $n \geq 30$  independent seedlings. Different letters indicate significant differences ( $P < 0.05$ , one-way ANOVA with Tukey's test).



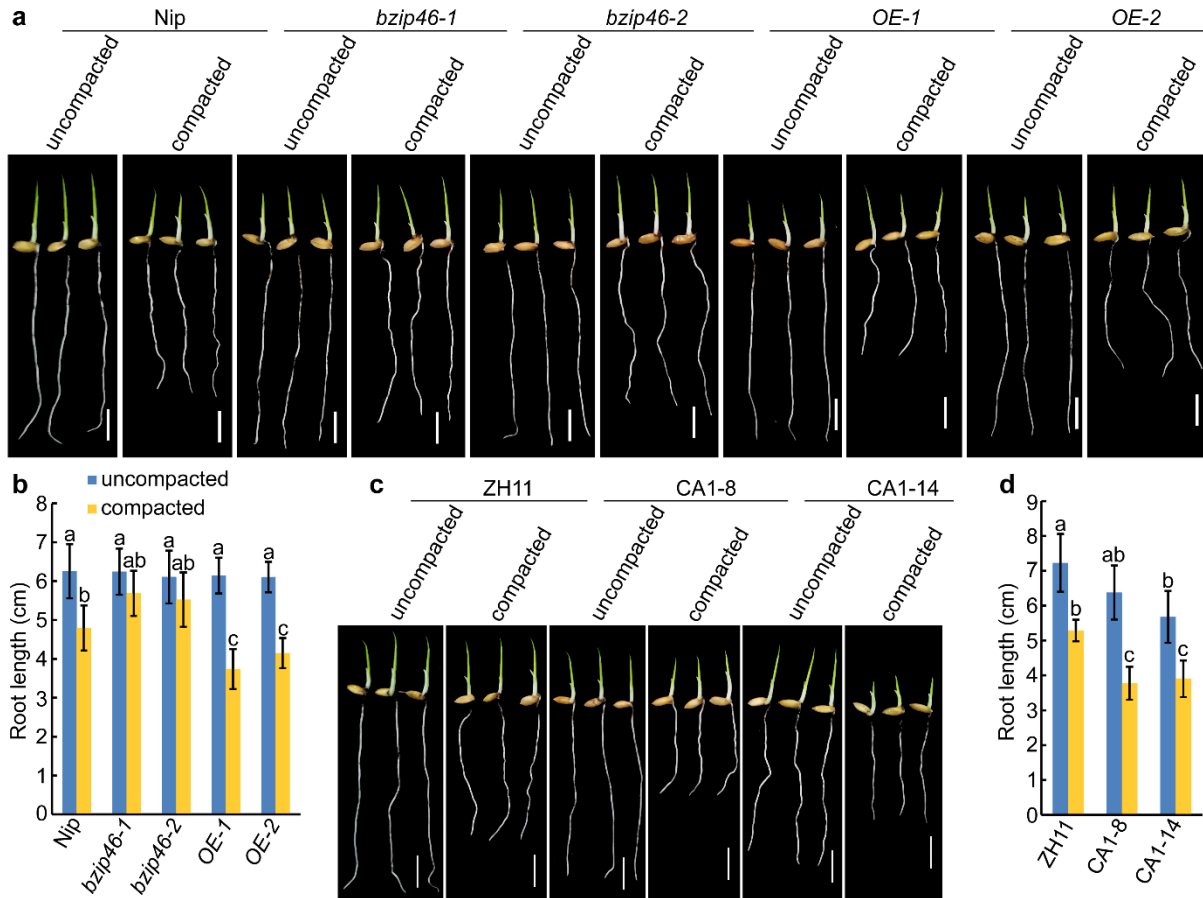

**Supplemental Figure S9.** *Os*bZIP46-mediated pathway is partially required for soil compaction-inhibited primary root growth. (a-d) Morphology (a and c) and primary root length (b and d) of 4-day-old Nip, *Os*bZIP46 knockout and overexpression seedlings, Zhonghua 11 (ZH11, a wild-type strain) and *Os*bZIP46-CA1 overexpression seedlings grown in uncompacted or compacted soil. Bars = 1 cm. Data are means  $\pm$  SD ( $n \geq 30$  independent seedlings). Different letters indicate significant differences ( $P < 0.05$ , one-way ANOVA with Tukey's test).

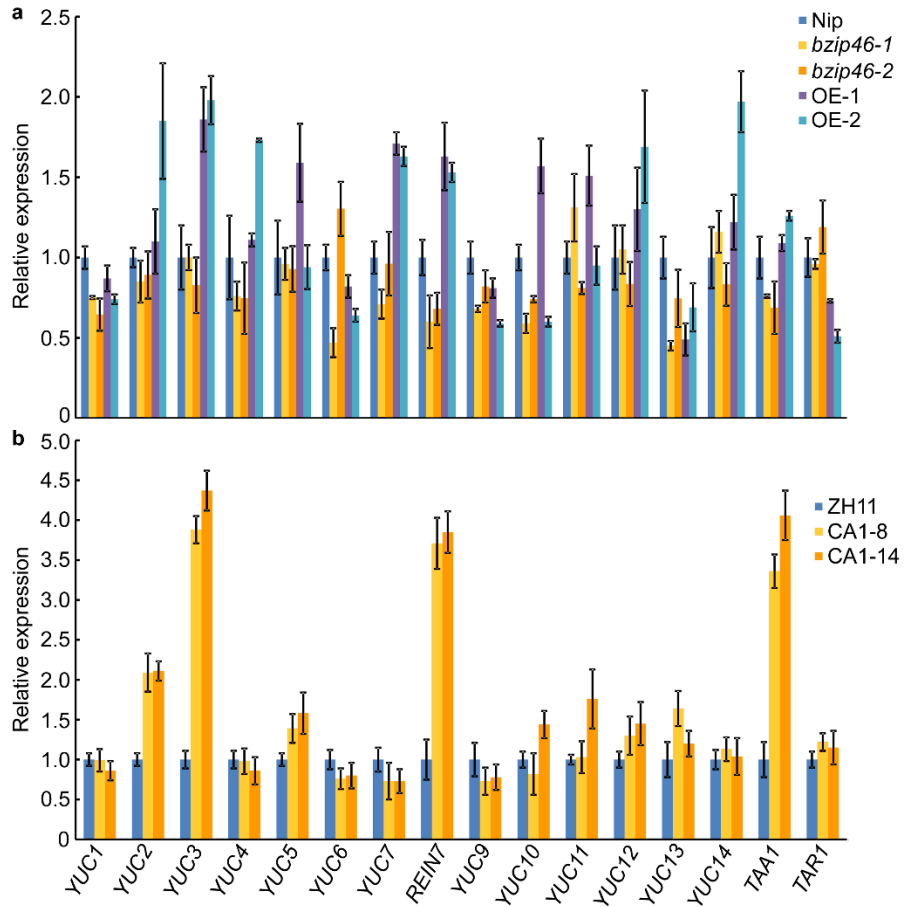

**Supplemental Figure S10.** *Os*bZIP46 positively regulates the expression of auxin biosynthesis genes in roots. (a and b) Expression of auxin biosynthesis genes in the roots of 4-day-old Nip, *Os*bZIP46 knockout and overexpression seedlings, Zhonghua 11 (ZH11, a wild-type strain), and *Os*bZIP46-CA1 overexpression seedlings. The data are shown as mean  $\pm$  SD, n = 3 biological replicates.

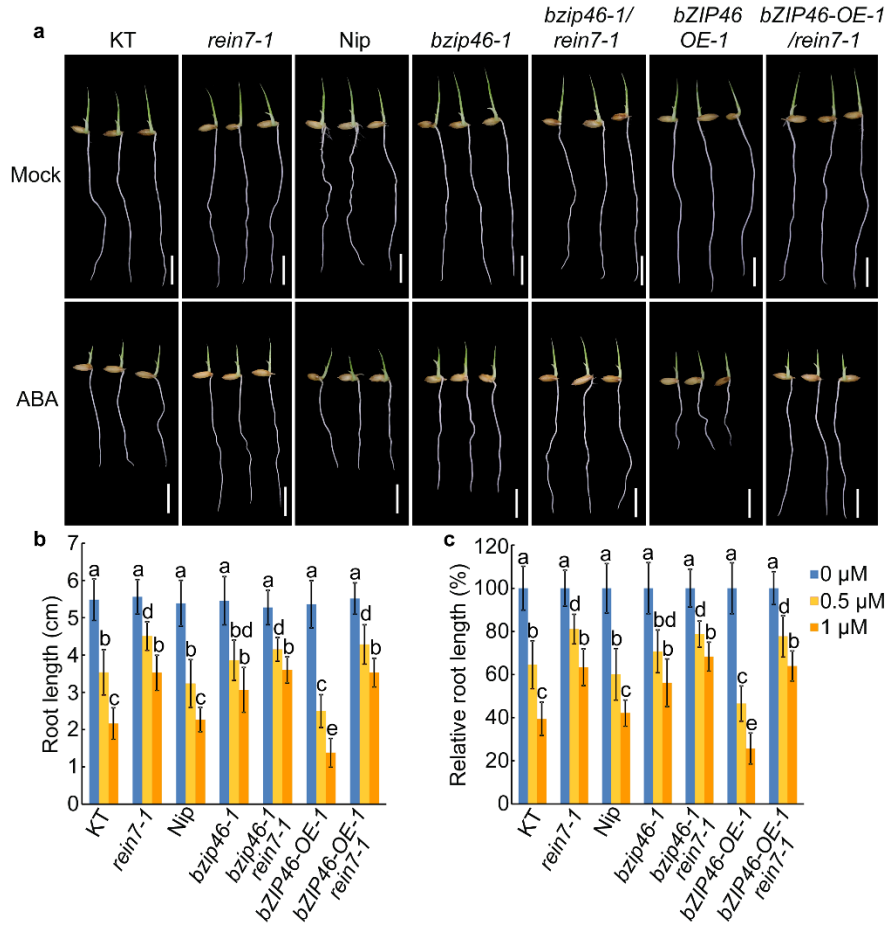

**Supplemental Figure S11.** *YUC8/REIN7* acts downstream of *OsZIP46* to regulate ABA response in roots. (a) Phenotypes of the primary roots of 4-day-old Nip, and combinations of *YUC8/REIN7* and *OsZIP46* knockout and overexpression seedlings with or without 0.5  $\mu$ M ABA treatment. Bar = 1 cm. (b and c) Primary root length (b) and relative root length (c) of 4-day-old Nip, and combinations of *YUC8/REIN7* and *OsZIP46* knockout and overexpression seedlings treated with various concentrations of ABA. The data are shown as mean  $\pm$  SD,  $n \geq 30$  independent seedlings. Different letters indicate significant differences ( $P < 0.05$ , one-way ANOVA with Tukey's test).

**Supplemental Table S1.** Primers used in this study.

| <b>Primer</b>                                                | <b>Sequence (5'-3')</b>       |
|--------------------------------------------------------------|-------------------------------|
| <b>RT-qPCR analysis</b>                                      |                               |
| <i>OsActin1-F</i>                                            | GACCTTGCTGGGCGTGAT            |
| <i>OsActin1-R</i>                                            | GTCATAGTCCAGGGCGATGT          |
| <i>YUC1-F</i>                                                | TCATCGGACGCCCTCAACGTCGC       |
| <i>YUC1-R</i>                                                | GGCAGAGCAAGATTATCAGTC         |
| <i>YUC2-F</i>                                                | CAACTCTGGCATGGAGGTGT          |
| <i>YUC2-R</i>                                                | GGATCGGCAACCATTGAGC           |
| <i>YUC3-F</i>                                                | GTGAGAACGGGCTCTACTCGGTCCG     |
| <i>YUC3-R</i>                                                | GCTTATGCATGACCGATGAACACG      |
| <i>YUC4-F</i>                                                | CTCGACCTCTGCAACCACAA          |
| <i>YUC4-R</i>                                                | GGAGTACCAGCCAATCCACC          |
| <i>YUC5-F</i>                                                | GAGAAATACGGCCTCCGACG          |
| <i>YUC5-R</i>                                                | CGACCCCATCCTCTGTGAAG          |
| <i>YUC6-F</i>                                                | CCATTCCCAGATGGTTGGAAGG        |
| <i>YUC6-R</i>                                                | CATGTTGCGCCTCAAGATATTG        |
| <i>YUC7-F</i>                                                | CAACGGATGGAAGGGTGAGT          |
| <i>YUC7-R</i>                                                | CTTCTTGGTTGGCTTCGTCG          |
| <i>YUC8-F</i>                                                | CCAACATCTCCTCGGTGTAG          |
| <i>YUC8-R</i>                                                | GCATCAGACAAGCAACATCC          |
| <i>YUC9-F</i>                                                | CACGATGTACCCGGTCCGTG          |
| <i>YUC9-R</i>                                                | TCTCCCCCTTCCAGTGATCC          |
| <i>YUC10-F</i>                                               | TTACCGGAGCACCACCAAG           |
| <i>YUC10-R</i>                                               | GTTGCTGATGTGGCCATTGTA         |
| <i>YUC11-F</i>                                               | ATGCCCAAGAAGGACTTCCC          |
| <i>YUC11-R</i>                                               | GAAGGCCTTGACGTCATTAGCA        |
| <i>YUC12-F</i>                                               | CATGCACCGCATCGTTATGG          |
| <i>YUC12-R</i>                                               | CCGTGCAGTGAGTCTTGCTA          |
| <i>YUC13-F</i>                                               | CCACACATGGCGTATCCTGT          |
| <i>YUC13-R</i>                                               | CAGCCCAACGGTTCTTACCT          |
| <i>YUC14-F</i>                                               | TAGGTTTCGAGGGAGAAGCCA         |
| <i>YUC14-R</i>                                               | GTACCGGGCTACGAACAAC           |
| <i>TAA1-F</i>                                                | CGCCCTACTACTCGTCATACC         |
| <i>TAA1-R</i>                                                | GATTGTTCGGGGAGCAGAC           |
| <i>TAR1-F</i>                                                | GCACCATACTACTCCTCGTACCC       |
| <i>TAR1-R</i>                                                | GACGAGCTCGACGTAGGTGT          |
| <i>OsZIP46-F</i>                                             | AGCAGGTGGAAATGATACAG          |
| <i>OsZIP46-R</i>                                             | GGTCCAAGTTGCTGAGTGATTC        |
| <b>To generate the <i>OsZIP46</i> overexpression vectors</b> |                               |
| <i>OsZIP46-OE-F</i>                                          | ATGTTCGACATGGAGTTGCCGGCGGATGG |
| <i>OsZIP46-OE-R</i>                                          | ATGGTACCCCATGGACCAGTCAGTGTTTC |

| <b>CRISPR/Cas9-mediated gene editing of <i>OsZIP46</i></b> |                                                                  |
|------------------------------------------------------------|------------------------------------------------------------------|
| OsZIP46-cas9-F                                             | GGCACATCGACCCGAAATCCTTCT                                         |
| OsZIP46-cas9-R                                             | AAACAGAAGGATTCGGGTCGATG                                          |
| <b>For dual-luciferase assays</b>                          |                                                                  |
| YUC8p-LUC-F                                                | ATGTCGACCGAGAGAGAGAGGGAGAAACA                                    |
| YUC8p-LUC-R                                                | ATGGATCCCGATCGATCGATGGCCCAAG                                     |
| <b>For ChIP-qPCR</b>                                       |                                                                  |
| YUC8-P1F                                                   | CGAGAGAGAGAGGGAGAAACA                                            |
| YUC8-P1R                                                   | TTCGAATCCACTCCAAATCA                                             |
| YUC8-P2F                                                   | ATATAAAATTTAGTACCTCCTG                                           |
| YUC8-P2R                                                   | TGCATATATCCAGATTTAAGC                                            |
| YUC8-P3F                                                   | GCACTATTGAGAATCGATTCA                                            |
| YUC8-P3R                                                   | ACGAATTTAACTCTCAGGAATT                                           |
| <b>For EMSA</b>                                            |                                                                  |
| OsZIP46-GST-F                                              | ATGGATCCATGGAGTTGCCGGCGGATGG                                     |
| OsZIP46-GST-R                                              | ACGTCGACCCATGGACCAGTCAGTGTTTC                                    |
| YUC8-Probe                                                 | GTTGGAAAGCGTATTTTATTCGCAAC <b>CGT</b> GCGGTTCTTCCAGTTTCTC<br>GGC |
| YUC8-Mutant Probe                                          | GTTGGAAAGCGTATTTTATTCGCAAAAA <b>AC</b> GCGTCTTCCAGTTTCTC<br>GGC  |
